# Supplementary material for: Spatiotemporal association between birth outcomes and coke production and steel making facilities in Alabama, USA: a cross-sectional study
Source: PubMed Central journal article supplement (PMC4223752; doi:10.1186/1476-069x-13-85), 2014-10-23
Supplement: 12940_2014_792_MOESM1_ESM.pdf [file 12940_2014_792_MOESM1_ESM.pdf]

Table S1. Sample characteristics of original, geocoded, and analyzed datasets

|                                               | <b>Original Dataset</b> | <b>Geocoded Dataset</b> | <b>Analyzed Dataset</b> |
|-----------------------------------------------|-------------------------|-------------------------|-------------------------|
|                                               | <b>N (%)</b>            | <b>N (%)</b>            | <b>N (%)</b>            |
| <i>Birth Weight (g)</i>                       |                         |                         |                         |
| < 200                                         | 78 (<0.1%)              | 62 (<0.1%)              | N/A                     |
| 200 - 2499                                    | 466,024 (90.1%)         | 376,093 (90.2%)         | 374,053 (90.6%)         |
| > 2500                                        | 51,030 (9.9%)           | 40,472 (9.7%)           | 38,884 (9.4%)           |
| Unknown, Not Stated                           | 213 (<0.1%)             | 167 (<0.1%)             | N/A                     |
| <i>Gestational Period (wks)</i>               |                         |                         |                         |
| < 24                                          | 1,777 (0.3%)            | 1,397 (0.3%)            | N/A                     |
| 24 - 36                                       | 454,397 (87.8%)         | 366,376 (87.9%)         | 364,842 (88.4%)         |
| > 37                                          | 60,247 (11.7%)          | 48,382 (11.6%)          | 48,095 (11.7%)          |
| Unknown, Not Stated                           | 924 (0.2%)              | 639 (0.2%)              | N/A                     |
| <i>Distance to nearest TRI Facility (km)*</i> |                         |                         |                         |
| > 5                                           | N/A                     | 390,492 (93.7%)         | 386,951 (93.7%)         |
| > 2.5 - 5.0                                   | N/A                     | 16,287 (3.9%)           | 16,079 (3.9%)           |
| ≤ 2.5                                         | N/A                     | 10,015 (2.4%)           | 9,907 (2.4%)            |
| <i>Race, Black</i>                            |                         |                         |                         |
| Yes                                           | 162,592 (31.4%)         | 129,111 (31.0%)         | 127,478 (30.9%)         |
| Unknown, Not Stated                           | 186 (<0.1%)             | 132 (<0.1%)             | N/A                     |
| <i>Ethnicity, Hispanic</i>                    |                         |                         |                         |
| Yes                                           | 21,573 (4.2%)           | 17,284 (4.2%)           | 16,766 (4.1%)           |
| Unknown, Not Stated                           | 277 (0.1%)              | 212 (0.1%)              | N/A                     |
| <i>Payment Method</i>                         |                         |                         |                         |
| Medicaid                                      | 242,291 (46.8%)         | 188,152 (45.1%)         | 186,437 (45.2%)         |
| Private Insurance                             | 253,703 (49.0%)         | 212,372 (51.0%)         | 211,313 (51.2%)         |
| Self Pay                                      | 15,810 (3.1%)           | 12,074 (2.9%)           | 11,626 (2.8%)           |
| Other                                         | 4,752 (0.9%)            | 3,636 (0.9%)            | 3,561 (0.9%)            |
| Unknown, Not Stated                           | 789 (0.2%)              | 560 (0.1%)              | N/A                     |
| <i>Education (years)</i>                      |                         |                         |                         |
| < 12                                          | 118,239 (22.9%)         | 89,469 (21.5%)          | 88,546 (21.4%)          |
| 12                                            | 169,997 (32.9%)         | 132,139 (31.7%)         | 131,142 (31.8%)         |
| > 12                                          | 227,789 (44.0%)         | 194,261 (46.6%)         | 193,249 (46.8%)         |
| Unknown, Not Stated                           | 1,320 (0.3%)            | 925 (0.2%)              | N/A                     |
| <i>Age (years)</i>                            |                         |                         |                         |
| < 18                                          | 29,360 (5.7%)           | 22,428 (5.4%)           | 21,983 (5.3%)           |
| 18-35                                         | 456,466 (88.2%)         | 367,466 (88.2%)         | 364,275 (88.2%)         |
| > 35                                          | 31,483 (6.1%)           | 26,891 (6.5%)           | 26,679 (6.5%)           |
| Unknown, Not Stated                           | 36 (<0.1%)              | 9 (<0.1%)               | N/A                     |
| <i>Parity (number of births)</i>              |                         |                         |                         |
| 1                                             | 216,345 (41.8%)         | 174,671 (41.9%)         | 172,967 (41.9%)         |
| 2                                             | 175,585 (33.9%)         | 141,695 (34.0%)         | 140,665 (34.1%)         |

|                   |                     |                |                |                |
|-------------------|---------------------|----------------|----------------|----------------|
|                   | 3                   | 82,462 (15.9%) | 66,476 (16.0%) | 65,869 (16.0%) |
|                   | 4 or more           | 42,823 (8.3%)  | 33,869 (8.1%)  | 33,436 (8.1%)  |
|                   | Unknown, Not Stated | 130 (<0.1%)    | 83 (<0.1%)     | N/A            |
| <i>Birth year</i> |                     |                |                |                |
|                   | 1991                | 26,617 (5.1%)  | 16,119 (3.9%)  | 15,986 (3.9%)  |
|                   | 1992                | 25,999 (5.0%)  | 16,802 (4.0%)  | 16,652 (4.0%)  |
|                   | 1993                | 26,300 (5.1%)  | 17,300 (4.2%)  | 17,090 (4.1%)  |
|                   | 1994                | 25,784 (5.0%)  | 17,865 (4.3%)  | 17,672 (4.3%)  |
|                   | 1995                | 25,679 (5.0%)  | 18,285 (4.4%)  | 18,047 (4.4%)  |
|                   | 1996                | 25,298 (4.9%)  | 18,821 (4.5%)  | 18,622 (4.5%)  |
|                   | 1997                | 25,742 (5.0%)  | 20,307 (4.9%)  | 20,090 (4.9%)  |
|                   | 1998                | 26,033 (5.0%)  | 21,074 (5.1%)  | 20,855 (5.1%)  |
|                   | 1999                | 26,378 (5.1%)  | 21,835 (5.2%)  | 21,590 (5.2%)  |
|                   | 2000                | 26,806 (5.2%)  | 22,641 (5.4%)  | 22,426 (5.4%)  |
|                   | 2001                | 25,318 (4.9%)  | 21,441 (5.1%)  | 21,286 (5.2%)  |
|                   | 2002                | 24,425 (4.7%)  | 20,940 (5.0%)  | 20,780 (5.0%)  |
|                   | 2003                | 24,933 (4.8%)  | 21,675 (5.2%)  | 21,465 (5.2%)  |
|                   | 2004                | 24,757 (4.8%)  | 21,764 (5.2%)  | 21,573 (5.2%)  |
|                   | 2005                | 25,492 (4.9%)  | 22,585 (5.4%)  | 22,356 (5.4%)  |
|                   | 2006                | 26,424 (5.1%)  | 23,346 (5.6%)  | 23,120 (5.6%)  |
|                   | 2007                | 27,155 (5.3%)  | 24,238 (5.8%)  | 23,923 (5.8%)  |
|                   | 2008                | 26,796 (5.2%)  | 23,820 (5.7%)  | 23,713 (5.7%)  |
|                   | 2009                | 26,355 (5.1%)  | 23,554 (5.7%)  | 23,453 (5.7%)  |
|                   | 2010                | 25,054 (4.8%)  | 22,382 (5.4%)  | 22,238 (5.4%)  |

\*Distance to TRI unknown before geocoding

Table S2. Adjusted\* odds ratios for LBW (< 2500 grams), LBW in full term (37 weeks gestation), and PTB births and proximity to specific coke or steel production facilities\*\* in Alabama and groups of facilities within close proximity of each other\*\*\*.

| <b>Facility Grouping</b>             | <b><u>LBW</u></b><br><b>OR (95% CI)</b> | <b><u>LBW (term)</u></b><br><b>OR (95% CI)</b> | <b><u>PTB</u></b><br><b>OR (95% CI)</b> |
|--------------------------------------|-----------------------------------------|------------------------------------------------|-----------------------------------------|
| <i>Exposure to Any Facility</i>      |                                         |                                                |                                         |
| Within 5 km of any facility          | 1.03 (0.99-1.07)                        | 1.04 (0.97-1.12)                               | 1.05 (1.01-1.09)                        |
| <i>Individual Facility Effects**</i> |                                         |                                                |                                         |
| Drummond Co Inc ABC Coke Div         | 1.05 (0.89-1.23)                        | 1.09 (0.83-1.43)                               | 1.04 (0.90-1.21)                        |
| DTE Red Mountain LLC                 | 0.79 (0.49-1.26)                        |                                                | 1.03 (0.68-1.57)                        |
| Empire Coke Co                       | 1.06 (0.83-1.34)                        | 1.25 (0.85-1.84)                               | 0.76 (0.59-0.97)                        |
| Gulf States Steel Inc. of Alabama    | 1.07 (0.89-1.28)                        | 1.08 (0.80-1.47)                               | 0.90 (0.75-1.08)                        |
| Koppers Industries Inc Woodward      | 1.00 (0.85-1.17)                        | 1.06 (0.81-1.39)                               | 0.93 (0.80-1.09)                        |
| Merichem Co                          | 1.46 (0.95-2.22)                        |                                                | 1.58 (1.08-2.30)                        |
| Nucor Steel Birmingham Inc           | 1.05 (0.95-1.15)                        | 0.91 (0.76-1.09)                               | 1.16 (1.06-1.28)                        |
| Nucor Steel Tuscaloosa Inc           | 1.12 (0.98-1.28)                        | 1.11 (0.86-1.41)                               | 1.07 (0.95-1.22)                        |
| Sloss Industries Birmingham          | 1.07 (0.67-1.70)                        | 1.31 (0.64-2.68)                               | 1.06 (0.68-1.67)                        |
| SMI Steel Inc                        | 0.96 (0.89-1.03)                        | 1.00 (0.88-1.14)                               | 1.03 (0.96-1.10)                        |
| USS Fairfield Works                  | 1.06 (0.98-1.15)                        | 1.08 (0.95-1.24)                               | 1.06 (0.99-1.15)                        |
| Walter Coke Inc                      | 1.07 (0.87-1.31)                        | 1.00 (0.69-1.43)                               | 1.11 (0.91-1.35)                        |
| <i>Facility Group Effects***</i>     |                                         |                                                |                                         |
| Birmingham Area                      | 1.00 (0.95-1.05)                        | 0.99 (0.90-1.09)                               | 1.07 (1.02-1.13)                        |
| Central Jefferson Co.                | 1.05 (0.98-1.13)                        | 1.08 (0.95-1.22)                               | 1.04 (0.97-1.11)                        |
| Tuscaloosa                           | 1.12 (1.00-1.26)                        | 1.16 (0.95-1.42)                               | 1.02 (0.92-1.14)                        |

\*Adjusted for race, ethnicity, payment method, age, education, parity, and birth year

\*\*Facilities with less than 5 observations for any outcome were eliminated

\*\*\*Facility Groups: Birmingham Area (Drummond Co. Inc. ABC Coke Div., DTE Red Mountain LLC, Nucor Steel Birmingham Inc., Sloss Industries Birmingham, SMI Steel Inc., Walter Coke Inc.); Central Jefferson Co. (Koppers Industries Inc. Woodward Coke Plant, USS Fairfield Works); Tuscaloosa (Empire Coke Co., Merichem Co., Nucor Steel Tuscaloosa Inc.)
